# Supplementary material for: The Impact of the Pandemic on the Quality of Colorectal and Anal Cancer Care, and 2-Year Clinical Outcomes
Source: MDPI journal article supplement (doi:10.3390/curroncol31040173), 2024-04-19
Supplement: s1 [file s1]

## Supplementary File 1. Quality Measure Definitions

| Type                       | Measure                                      | Source                                 | Definition                                                                                                                                                                                                                                                                                                                                                               | Cohort Restrictions                                                                                                                                                                                                          |
|----------------------------|----------------------------------------------|----------------------------------------|--------------------------------------------------------------------------------------------------------------------------------------------------------------------------------------------------------------------------------------------------------------------------------------------------------------------------------------------------------------------------|------------------------------------------------------------------------------------------------------------------------------------------------------------------------------------------------------------------------------|
| Pandemic-Specific Measures | Receipt of neoadjuvant chemotherapy          | Scoping literature review <sup>1</sup> | Proportion of patients who received some systemic therapy prior to surgery                                                                                                                                                                                                                                                                                               | Restrict cohort to patients who received surgery for stage III colon or stage II-IV rectal                                                                                                                                   |
|                            | Laparoscopic Resection                       | Scoping literature review <sup>1</sup> | Proportion of patients who had surgical resection of colon cancer for which laparoscopy was used                                                                                                                                                                                                                                                                         | Restrict cohort to only those patients who had a surgical resection for colon<br><br>*Exclude: patients who had biopsy only                                                                                                  |
|                            | Short-course radiotherapy                    | Scoping literature review <sup>1</sup> | Proportion of patients who received short course radiotherapy for rectal cancer (25Gy, 5 fractions)                                                                                                                                                                                                                                                                      | Restrict cohort to patients who received radiotherapy for rectal cancer                                                                                                                                                      |
|                            | Oral systemic therapy                        | Scoping literature review <sup>1</sup> | Proportion of patients on systemic therapy who received at least one oral anti-cancer agent                                                                                                                                                                                                                                                                              | Restrict cohort to only those patients who received systemic therapy                                                                                                                                                         |
|                            | Single Agent Regimens                        | Scoping literature review <sup>1</sup> | Proportion of patients who received treatment with a single-agent regimen                                                                                                                                                                                                                                                                                                | Restrict to patients who received systemic therapy                                                                                                                                                                           |
|                            | Treatment deferral/interruption              | Scoping literature review <sup>1</sup> | Proportion of patients who experienced a delay or deferral of their treatment<br><br><b>Deferral:</b> start of a patients' treatment was pushed to a later date as per clinic note or recorded deferral<br><br><b>Interruption:</b> patients who are on treatment and have an administration held or delayed for any length of time as documented in their medical chart | <b>Deferral:</b><br>restrict to patients receiving treatment (surgery, systemic therapy radiotherapy)<br><br><b>Interruption:</b><br>Restrict to patients who received at least one dose of systemic therapy or radiotherapy |
|                            | Premature discontinuation                    | Scoping literature review <sup>1</sup> | Proportion of patients who stopped treatment prior to completion of their regimen                                                                                                                                                                                                                                                                                        | <b>Systemic therapy:</b><br>Restrict to patients who received systemic therapy<br><br><b>Radiotherapy:</b><br>Restrict to patients who received radiotherapy                                                                 |
|                            | Trial Participation                          | Scoping literature review <sup>1</sup> | Proportion of patients who participated in an interventional clinical trial                                                                                                                                                                                                                                                                                              | All cohort                                                                                                                                                                                                                   |
| Quality Measures           | Receipt of appropriate oncology consultation | ASCO Guidelines                        | Proportion of patients who received consultation with appropriate oncology services for disease location (radiation, surgical, medical): <ul style="list-style-type: none"> <li><b>Colon:</b> consultation with a surgical oncologist, with or without a consultation with a medical oncologist</li> </ul>                                                               | All patients in cohort<br><br>*Stratified by location of disease (colon, rectum, anus)                                                                                                                                       |

|  |                                         |                      |                                                                                                                                                                                                                                                                                                                                                                                                                                                                                                         |                                                                                                                                                                                                                       |
|--|-----------------------------------------|----------------------|---------------------------------------------------------------------------------------------------------------------------------------------------------------------------------------------------------------------------------------------------------------------------------------------------------------------------------------------------------------------------------------------------------------------------------------------------------------------------------------------------------|-----------------------------------------------------------------------------------------------------------------------------------------------------------------------------------------------------------------------|
|  |                                         |                      | <ul style="list-style-type: none"> <li>• <b>Rectum:</b> consultation with each of a surgical oncologist AND medical oncologist AND radiation oncologist</li> <li>• <b>Anus:</b> consultations with each of a medical oncologist AND radiation oncologist</li> </ul>                                                                                                                                                                                                                                     |                                                                                                                                                                                                                       |
|  |                                         |                      | *higher proportion= better care                                                                                                                                                                                                                                                                                                                                                                                                                                                                         |                                                                                                                                                                                                                       |
|  | <b>30-day post-surgical readmission</b> | CSQI                 | Proportion of patients who had surgical resection that experienced a readmission to our hospital in the 30 days following discharge<br><br>*lower proportion= better care                                                                                                                                                                                                                                                                                                                               | Restrict cohort to only those patients who had a surgical resection of their primary by a PM surgical oncologist<br><br>*Exclude patients who received a biopsy only                                                  |
|  | <b>Unplanned acute care visit</b>       | CSQI                 | Proportion of patients who had an unplanned emergency department visit or hospitalization after their first consultation at PM<br><br>*lower proportion= better care                                                                                                                                                                                                                                                                                                                                    | All patients in cohort                                                                                                                                                                                                |
|  | <b>Receipt of appropriate treatment</b> | CSQI                 | proportion of patients who received appropriate treatment<br><br>*3 specific scenarios: <ul style="list-style-type: none"> <li>• Colon: proportion of patients who received treatment with surgery for stage I-III disease</li> <li>• Rectum: proportion of patients who received treatment with systemic therapy for stage II-IV disease</li> <li>• Anus: proportion of patients who received concurrent chemotherapy and radiation for stage I-III disease</li> </ul> *higher proportion= better care | <b>Colon:</b> Patients with stage I-III disease<br><br><b>Rectum:</b> Patients with stage II-IV disease<br><br><b>Anus:</b> Patients with stage I-III disease                                                         |
|  | <b>Positive margins</b>                 | CSQI                 | Proportion of patients who have positive surgical margins<br><br>*lower proportion= better care                                                                                                                                                                                                                                                                                                                                                                                                         | Restrict to patients who received surgical resection                                                                                                                                                                  |
|  | <b>30-day mortality</b>                 | ASCO Choosing Wisely | Proportion of patients who die within 30 days of treatment<br><br>*lower proportion= better care                                                                                                                                                                                                                                                                                                                                                                                                        | <b>Systemic Therapy:</b> restrict to patients who received at least one dose of systemic therapy<br><br><b>Surgery:</b> Restrict to patients who received surgical resection at PM<br>*exclude receipt of biopsy only |

|  |                                                  |                                                 |                                                                                                                                                      |                                                                                                                                    |
|--|--------------------------------------------------|-------------------------------------------------|------------------------------------------------------------------------------------------------------------------------------------------------------|------------------------------------------------------------------------------------------------------------------------------------|
|  | <b>Timely oncologist consultation</b>            | Health Quality Ontario                          | Proportion of patients that had a consultation with an oncologist within 2 weeks of referral<br><br>*higher proportion= better care                  | Restrict to patients with a known referral date who's first consult was with medical or radiation oncology                         |
|  | <b>Upstaging</b>                                 | CSQI                                            | Proportion of patients with advanced stage disease at diagnosis<br><br>*lower proportion= better care                                                | All patients in cohort who were staged at diagnosis                                                                                |
|  | <b>Timely receipt of treatment</b>               | CSQI                                            | Proportion of patients who initiated treatment within 60 days of the date of their diagnosis<br><br>*higher proportion= better care                  | Restrict to patients who received systemic therapy or radiotherapy                                                                 |
|  | <b>Diagnosed in emergency department</b>         | AHRQ                                            | Proportion of patients who are diagnosed as a result of an emergency department visits or hospitalization<br><br>*lower proportion= better care      | Restrict to those patients in the cohort with a known location of diagnosis                                                        |
|  | <b>Pathologically confirmed disease</b>          | ASCO QOPI                                       | Proportion of patients with a pathology report in their medical chart confirming diagnosis<br><br>*higher proportion= better care                    | All cohort                                                                                                                         |
|  | <b>Receipt of treatment for advanced disease</b> | CPAC                                            | Proportion of patients with stage IV disease who received treatment (surgery, systemic therapy, radiotherapy)<br><br>*higher proportion= better care | Restrict to patients with stage IV disease                                                                                         |
|  | <b>Receipt of a palliative care consultation</b> | Canadian Society for Palliative Care Physicians | Proportion of patients with advanced disease who received a consultation with palliative care<br><br>*higher proportion= better care                 | Restrict to patients with stage IV disease                                                                                         |
|  | <b>Consent to treatment</b>                      | ASCO QOPI                                       | Proportion of patients who have evidence of consent to treatment in their medical record<br><br>*higher proportion= better care                      | Restrict to those patients who received treatment (surgery, systemic therapy, radiotherapy)<br><br>*stratify by treatment modality |
|  | <b>Receipt of psychosocial support</b>           | ASCO QOPI                                       | Proportion of patients who have evidence of a psychosocial consultation<br><br>*higher proportion= better care                                       | All cohort                                                                                                                         |
|  | <b>Receipt of pain management support</b>        | ASCO QOPI                                       | Proportion of patients who received a consultation for pain management<br><br>*higher proportion= better care                                        | Restrict to patients with stage IV disease                                                                                         |

AHRQ: Agency for Healthcare Research and Quality; ASCO: American Society of Clinical Oncology; CPAC: Canadian Partnership Against Cancer; CSQI: Cancer System Quality Index; QOPI: Quality Oncology Practice Initiative

**Supplementary File 2.** Evaluating potential associations between patient-level sociodemographic and clinical characteristics, and overall quality score by Poisson regression with score as a count, and the number of measures the patient was eligible for as an offset

| Variables                            |                                       | Univariate- COVID |           |         | Univariate-Comparator |           |         |
|--------------------------------------|---------------------------------------|-------------------|-----------|---------|-----------------------|-----------|---------|
|                                      |                                       | IRR               | 95% CI    | p-value | IRR                   | 95% CI    | p-value |
| Age                                  | 5-years                               | 1.06              | 0.97-1.18 | 0.24    | 1.00                  | 0.98-1.02 | 0.78    |
| Sex                                  | Male                                  | Ref               | -         | -       | Ref                   | -         | -       |
|                                      | Female                                | 1.05              | 0.95-1.16 | 0.35    | 0.99                  | 0.90-1.08 | 0.80    |
| Marital Status                       | Married/ common law                   | Ref               | -         | -       | Ref                   | -         | -       |
|                                      | Divorced                              | 0.94              | 0.73-1.20 | 0.64    | 1.18                  | 0.98-1.41 | 0.07    |
|                                      | Single                                | 1.07              | 0.93-1.22 | 0.34    | 0.95                  | 0.83-1.08 | 0.44    |
|                                      | Unknown                               | 0.99              | 0.86-1.13 | 0.88    | 0.98                  | 0.86-1.12 | 0.80    |
| Language                             | English first language                | Ref               | -         | -       | Ref                   | -         | -       |
|                                      | Other                                 | 0.97              | 0.84-1.12 | 0.70    | 0.94                  | 0.82-1.07 | 0.38    |
| Highest Level of Education Completed | Less than high school                 | 1.10              | 0.63-1.80 | 0.73    | 1.04                  | 0.74-1.44 | 0.82    |
|                                      | High school                           | 0.91              | 0.70-1.20 | 0.49    | 0.86                  | 0.68-1.10 | 0.22    |
|                                      | College diploma/ Undergraduate degree | 0.87              | 0.65-1.18 | 0.36    | 0.86                  | 0.67-1.12 | 0.26    |
|                                      | Graduate degree                       | Ref               | -         | -       | Ref                   | -         | -       |
|                                      | Unknown                               | 0.87              | 0.68-1.12 | 0.25    | 0.84                  | 0.68-1.03 | 0.09    |
| Socioeconomic Status                 | 1- lowest                             | 0.94              | 0.81-1.10 | 0.47    | 1.02                  | 0.89-1.17 | 0.76    |
|                                      | 2                                     | 0.97              | 0.83-1.14 | 0.75    | 0.97                  | 0.83-1.12 | 0.65    |
|                                      | 3                                     | 0.98              | 0.83-1.14 | 0.76    | 0.92                  | 0.80-1.07 | 0.29    |
|                                      | 4                                     | 1.03              | 0.88-1.22 | 0.69    | 0.98                  | 0.85-1.13 | 0.81    |
|                                      | 5- highest                            | Ref               | -         | -       | Ref                   | -         | -       |
|                                      | Rural                                 | 1.01              | 0.79-1.27 | 0.96    | 0.91                  | 0.70-1.16 | 0.44    |
| ON-MARG: Households and Dwellings    | 1- least marginalized                 | Ref               | -         | -       | Ref                   | -         | -       |
|                                      | 2                                     | 0.888             | 0.72-1.08 | 0.22    | 0.97                  | 0.80-1.17 | 0.74    |
|                                      | 3                                     | 0.82              | 0.67-1.00 | 0.06    | 0.96                  | 0.79-1.16 | 0.65    |
|                                      | 4                                     | 0.93              | 0.79-1.11 | 0.42    | 0.94                  | 0.79-1.11 | 0.45    |
|                                      | 5- most marginalized                  | 0.91              | 0.79-1.06 | 0.23    | 1.03                  | 0.89-1.19 | 0.70    |
| ON-MARG: Material Resources          | 1- least marginalized                 | Ref               | -         | -       | Ref                   | -         | -       |
|                                      | 2                                     | 0.97              | 0.84-1.12 | 0.65    | 0.99                  | 0.87-1.13 | 0.92    |
|                                      | 3                                     | 0.89              | 0.76-1.05 | 0.18    | 0.98                  | 0.85-1.12 | 0.74    |
|                                      | 4                                     | 0.98              | 0.84-1.14 | 0.80    | 1.00                  | 0.86-1.15 | 0.95    |
|                                      | 5- most marginalized                  | 0.92              | 0.78-1.08 | 0.30    | 0.98                  | 0.84-1.13 | 0.75    |
| ON-MARK: Age and Labour Force        | 1-least marginalized                  | Ref               | -         | -       | Ref                   | -         | -       |
|                                      | 2                                     | 0.97              | 0.84-1.11 | 0.61    | 0.98                  | 0.86-1.13 | 0.82    |

|                                                                 |                              |      |           |       |      |           |       |
|-----------------------------------------------------------------|------------------------------|------|-----------|-------|------|-----------|-------|
|                                                                 | <b>3</b>                     | 0.96 | 0.83-1.12 | 0.63  | 1.04 | 0.90-1.20 | 0.62  |
|                                                                 | <b>4</b>                     | 0.89 | 0.74-1.07 | 0.23  | 1.01 | 0.84-1.20 | 0.95  |
|                                                                 | <b>5-most marginalized</b>   | 0.97 | 0.83-1.14 | 0.72  | 1.09 | 0.96-1.24 | 0.20  |
| <b>ON-MARG:<br/>Racialized and<br/>Newcomer<br/>Populations</b> | <b>1- least marginalized</b> | Ref  | -         | -     | Ref  | -         | -     |
|                                                                 | <b>2</b>                     | 1.08 | 0.84-1.38 | 0.56  | 1.00 | 0.80-1.24 | 0.97  |
|                                                                 | <b>3</b>                     | 1.03 | 0.84-1.28 | 0.78  | 1.00 | 0.83-1.22 | 0.99  |
|                                                                 | <b>4</b>                     | 1.07 | 0.88-1.31 | 0.53  | 1.03 | 0.86-1.24 | 0.76  |
|                                                                 | <b>5- most marginalized</b>  | 1.02 | 0.84-1.25 | 0.84  | 1.03 | 0.86-1.24 | 0.76  |
|                                                                 |                              |      |           |       |      |           |       |
| <b>Primary</b>                                                  | <b>Colon</b>                 | Ref  | -         | -     | Ref  | -         | -     |
|                                                                 | <b>Rectum</b>                | 0.91 | 0.81-1.02 | 0.12  | 0.91 | 0.82-1.00 | 0.05  |
|                                                                 | <b>Anus</b>                  | 1.13 | 0.95-1.32 | 0.15  | 1.10 | 0.92-1.31 | 0.27  |
| <b>Stage at diagnosis</b>                                       | <b>I</b>                     | Ref  | -         | -     | Ref  | -         | -     |
|                                                                 | <b>II</b>                    | 0.98 | 0.82-1.17 | 0.83  | 1.00 | 0.86-1.18 | 0.96  |
|                                                                 | <b>III</b>                   | 0.90 | 0.77-1.06 | 0.19  | 1.03 | 0.89-1.19 | 0.73  |
|                                                                 | <b>IV</b>                    | 0.74 | 0.64-0.87 | <0.01 | 0.76 | 0.66-0.88 | <0.01 |
|                                                                 |                              |      |           |       |      |           |       |
| <b>ECOG<br/>Performance<br/>Status</b>                          | <b>0</b>                     | Ref  | -         | -     | Ref  | -         | -     |
|                                                                 | <b>1</b>                     | 0.93 | 0.80-1.09 | 0.37  | 0.99 | 0.88-1.11 | 0.88  |
|                                                                 | <b>2</b>                     | 0.68 | 0.50-0.92 | 0.01  | 0.85 | 0.70-1.02 | 0.09  |
|                                                                 | <b>3</b>                     | 0.84 | 0.64-1.09 | 0.20  | 0.88 | 0.72-1.08 | 0.23  |
|                                                                 | <b>4</b>                     | 1.05 | 0.41-2.15 | 0.91  | 0.97 | 0.35-2.10 | 0.95  |

IRR: incident rate ratio; ON-MARG: Ontario Marginalization Index; ECOG: Eastern Cooperative Oncology Group
